# Supplementary material
Source: MDPI journal article supplement (https://www.mdpi.com/2075-4701/13/4/799)
Supplement: s1 [file s1]

Article

# Boosting Electrocatalytic Reduction of Nitrate to Ammonia over $\text{Co}_3\text{O}_4$ Nanosheets with Oxygen Vacancies

Xing Wu <sup>1</sup>, Zhigong Liu <sup>1</sup>, Tianyu Gao <sup>1</sup>, Zhizhuo Li <sup>1</sup>, Zhenhui Song <sup>1</sup>, Jia Tang <sup>1</sup>, Fan Feng <sup>1</sup>, Caiyan Qu <sup>1</sup>, Fubing Yao <sup>1,2,3,\*</sup> and Chongjian Tang <sup>1,2,3,\*</sup>

<sup>1</sup> School of Metallurgy and Environment, Central South University, Changsha 410083, China

<sup>2</sup> Chinese National Engineering Research Center for Control & Treatment of Heavy Metal Pollution, Changsha 410083, China

<sup>3</sup> State Key Laboratory of Advanced Metallurgy for Non-ferrous Metals, Changsha 410083, China

\* Correspondence: yaofubing@csu.edu.cn (F.Y.); chjtang@csu.edu.cn (C.T.)

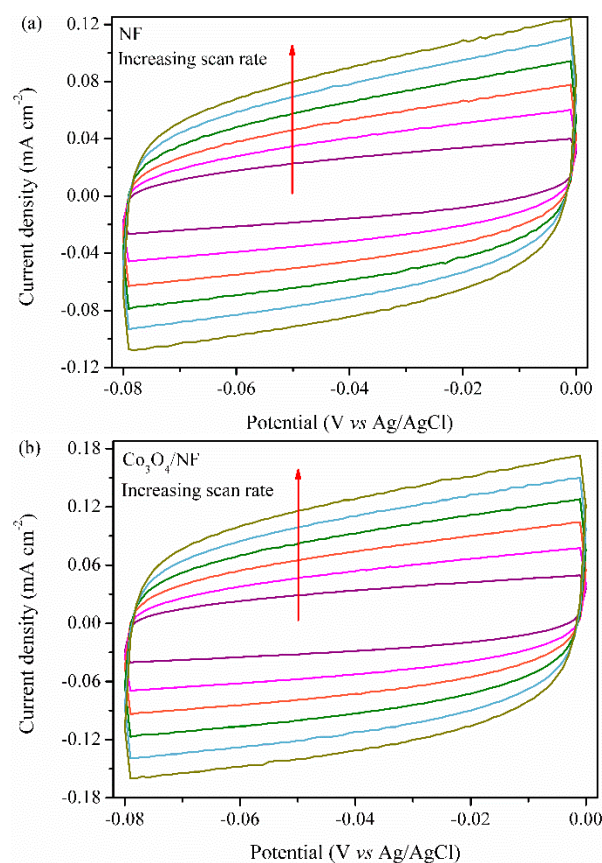

**Figure S1.** CV curves of NF (a) and  $\text{Co}_3\text{O}_4/\text{NF}$  (b) in the range of  $-0.06 \sim 0.06$  V vs. Ag/AgCl.

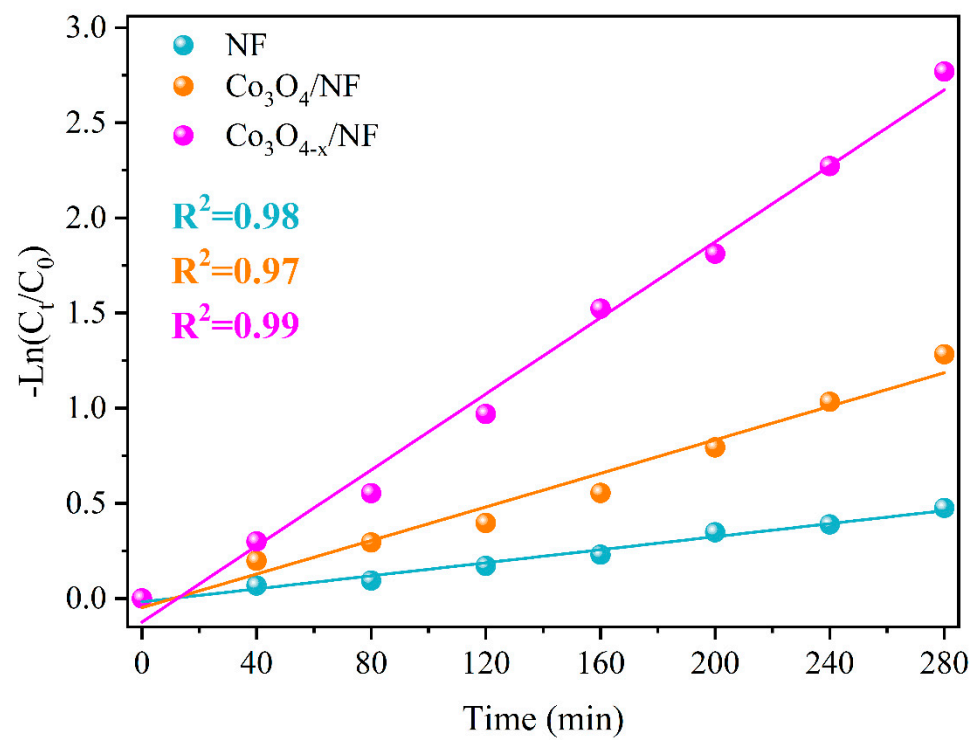

**Figure S2.** The pseudo-first-order kinetic analyses.
